# Supplementary material for: A dynamic tetranuclear gold(i)-cyclophane – gold(i)-centred chirality and fluxionality arising from an intramolecular shift of Au–S bonds
Source: Royal Society of Chemistry journal article supplement (doi:10.1039/d1dt01984h), 2021-01-01
Supplement: d1dt01984h1.pdf [file d1dt01984h1.pdf]

## Supporting Information

### **A Dynamic Tetranuclear Gold(I)-Cyclophane – Gold(I)-Centred Chirality and Fluxionality Arising from Intramolecular Shift of Au-S Bonds**

Pau Lin Ang, Van Ha Nguyen, John H. K. Yip\*

#### **Content**

Table S1 X-ray crystal data of **1**·2Et<sub>2</sub>O.

Figure S1 MALDI-TOF mass spectrum of **1**.

Figure S2 Zoom scan of [**1**+Au]<sup>+</sup> cluster peak and simulated isotope distribution.

Figure S3 COSY <sup>1</sup>H NMR spectrum of **1**.

| <b>Table S1</b> Crystal data of <b>1·2Et<sub>2</sub>O</b> |                                                                                                 |
|-----------------------------------------------------------|-------------------------------------------------------------------------------------------------|
| Compounds                                                 | <b>1·2Et<sub>2</sub>O</b>                                                                       |
| Empirical formula                                         | C <sub>96</sub> H <sub>84</sub> Au <sub>4</sub> O <sub>2</sub><br>P <sub>4</sub> S <sub>4</sub> |
| Formula weight                                            | 2309.61                                                                                         |
| Crystal system                                            | triclinic                                                                                       |
| Space group                                               | <i>P</i> $\bar{1}$                                                                              |
| Unit cell dimensions                                      |                                                                                                 |
| <i>a</i> (Å)                                              | 12.8550(6)                                                                                      |
| <i>b</i> (Å)                                              | 13.0540(7)                                                                                      |
| <i>c</i> (Å)                                              | 13.8019(7)                                                                                      |
| $\alpha$ (°)                                              | 109.2250(16)                                                                                    |
| $\beta$ (°)                                               | 99.6320(17)                                                                                     |
| $\gamma$ (°)                                              | 100.9310(16)                                                                                    |
| Volume (Å <sup>3</sup> )                                  | 2080.26(18)                                                                                     |
| <i>Z</i>                                                  | 1                                                                                               |
| Calculated density (g cm <sup>-3</sup> )                  | 1.844                                                                                           |
| Absorption coefficient (mm <sup>-1</sup> )                | 7.258                                                                                           |
| <i>F</i> (000)                                            | 1116                                                                                            |
| Crystal size (mm <sup>3</sup> )                           | 0.060 × 0.070<br>× 0.200                                                                        |
| $\theta$ range for data collection (°)                    | 2.05 to 28.34                                                                                   |
| Index ranges                                              | -17 ≤ <i>h</i> ≤ 17,<br>-14 ≤ <i>k</i> ≤ 17,<br>-18 ≤ <i>l</i> ≤ 18                             |
| Reflections collected                                     | 45591                                                                                           |
| Independent reflections [ <i>R</i> (int)]                 | 10343<br>0.0401                                                                                 |
| Max. and min. transmission                                | 0.7457 and<br>0.5648                                                                            |
| Data/restraints/parameters                                | 10343 / 0 /<br>498                                                                              |
| Goodness-of-fit                                           | 1.036                                                                                           |
| Final <i>R</i> indices [ <i>I</i> > 2σ( <i>I</i> )]       | <i>R</i> 1 = 0.0272,<br><i>wR</i> 2 = 0.0596                                                    |
| Largest diff. peak and hole (e.Å <sup>-3</sup> )          | 2.582 and -<br>1.412                                                                            |

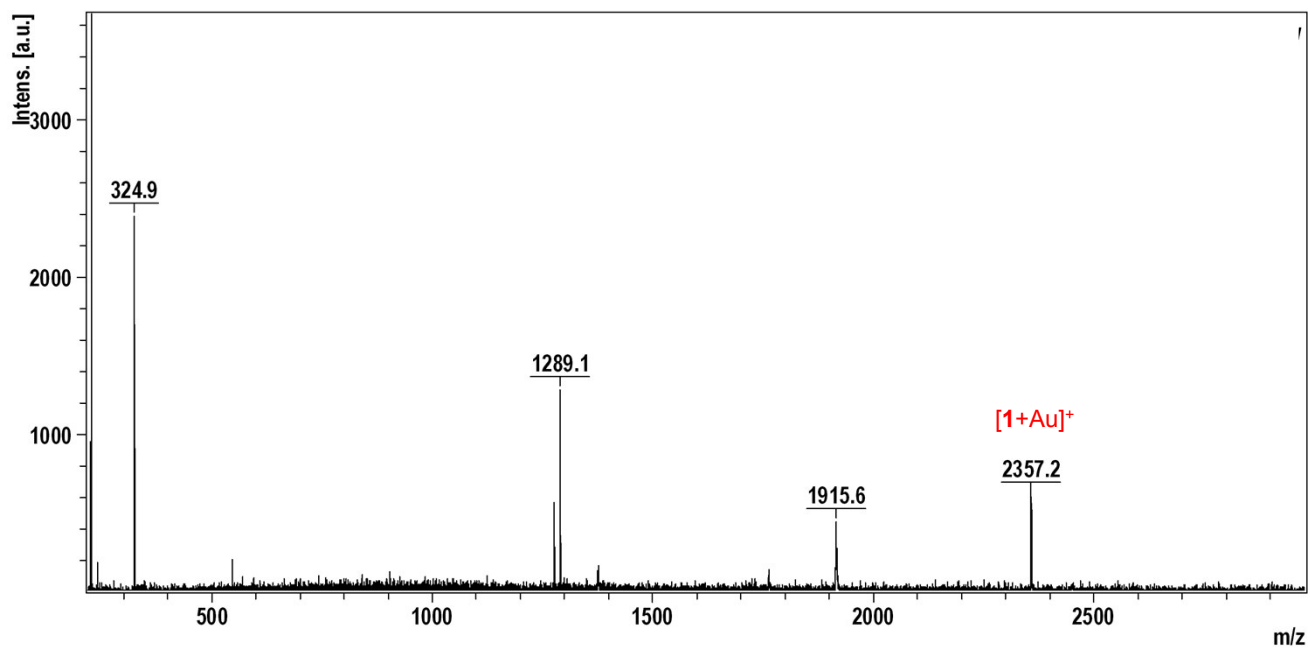

Figure S1 MALDI-TOF mass spectrum of **1**.

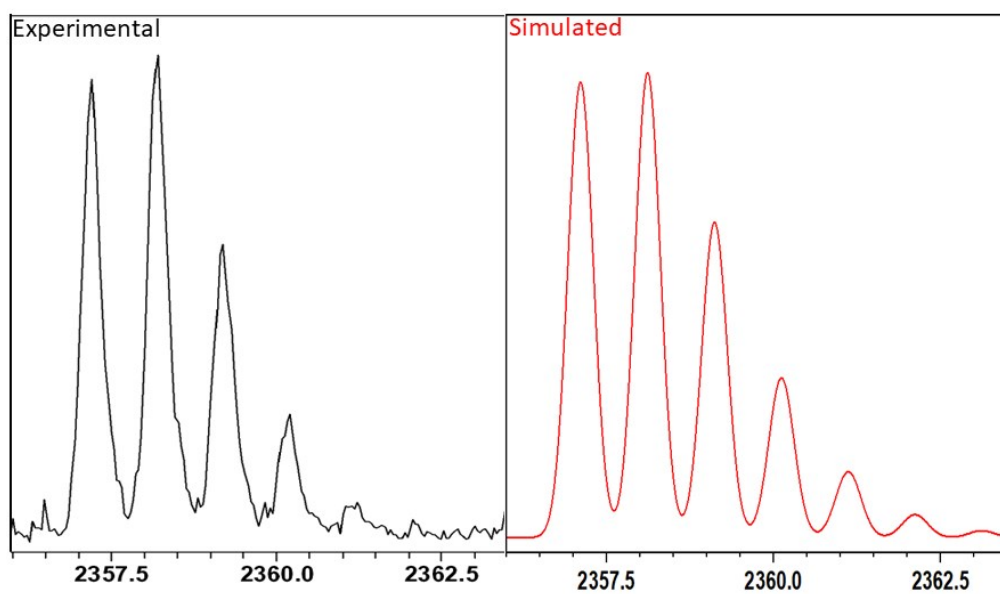

Figure S2 Zoom scan of  $[1+Au]^+$  cluster peak (left) and simulated isotope distribution (right)

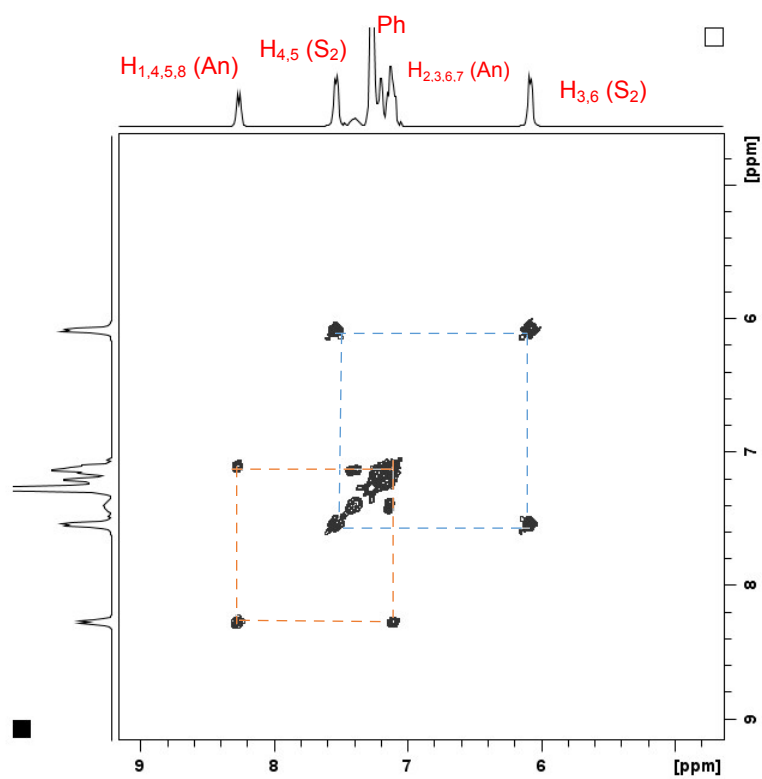

Figure S3 COSY  $^1\text{H}$  NMR spectrum of **1** ( $\text{CDCl}_3$ , 298 K).

13C AVNEO500 11 July 2021  
AuS4 in CDCl3

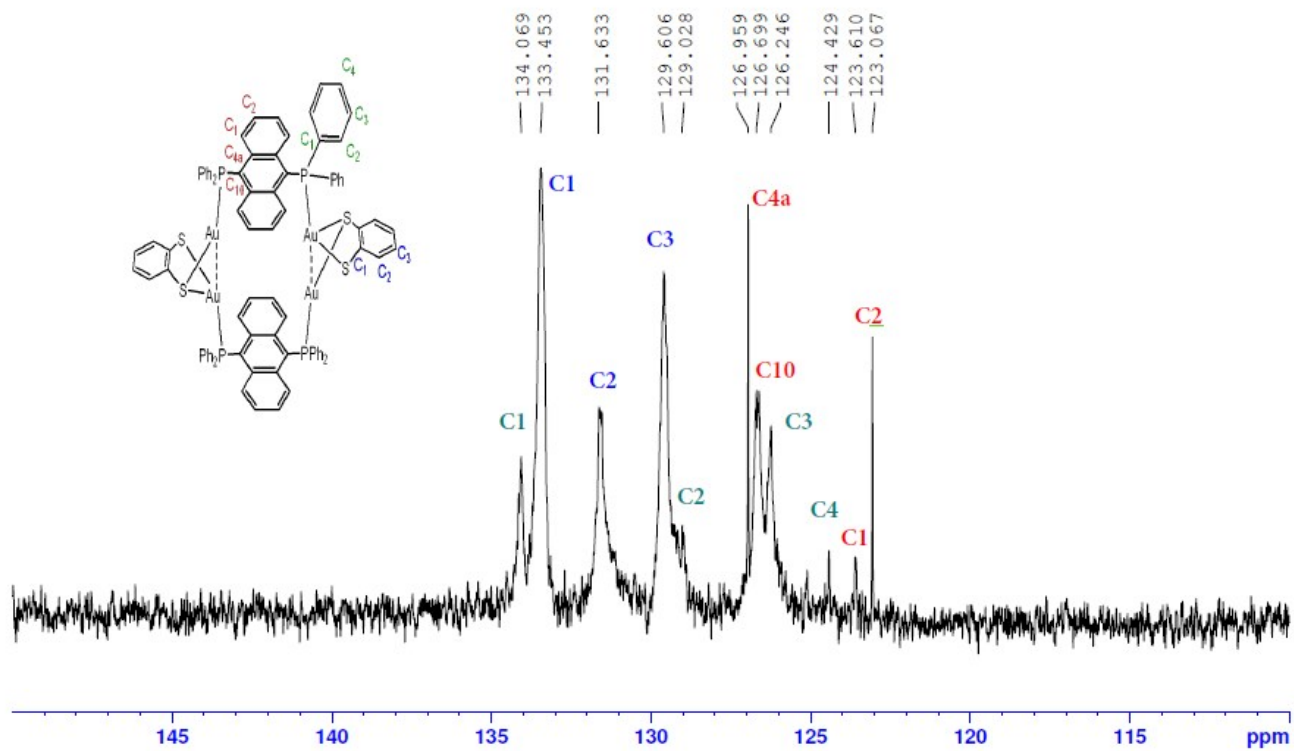

Figure S4  $^{13}\text{C}\{^1\text{H}\}$  NMR spectrum of **1** ( $\text{CDCl}_3$ , 298 K).

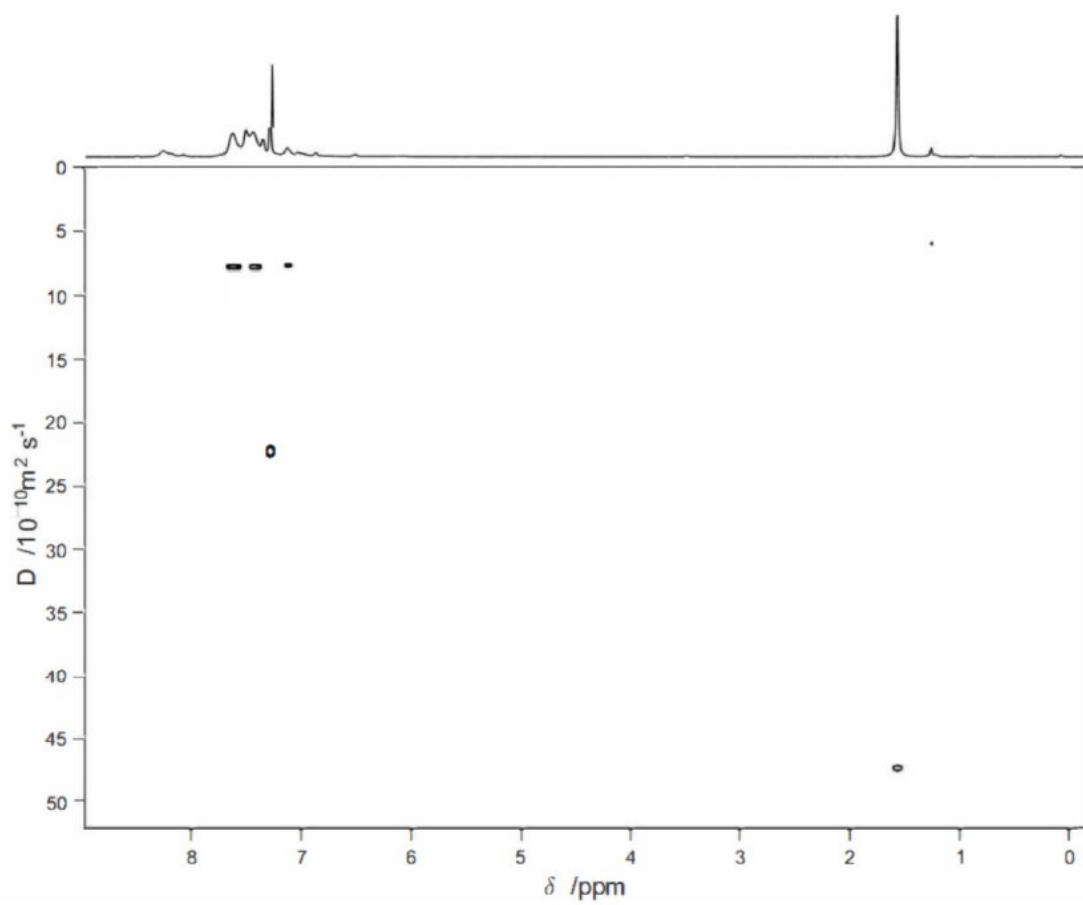

Figure S5 <sup>1</sup>H DOSY NMR spectrum of **1** (CDCl<sub>3</sub>, 298 K)
